# Supplementary material
Source: PubMed Central journal article supplement (PMC4347661)
Supplement: NIHMS62282-supplement-Supplementary_Table_1.pdf [file NIHMS62282-supplement-Supplementary_Table_1.pdf]

| <b>Supplementary Table 1: Lack of fit test</b> |                           |                       |                     |                |                |
|------------------------------------------------|---------------------------|-----------------------|---------------------|----------------|----------------|
|                                                | <b>Degrees of freedom</b> | <b>Sum of squares</b> | <b>Mean squares</b> | <b>F-ratio</b> | <b>p-Value</b> |
| <b>DENV1 system</b>                            |                           |                       |                     |                |                |
| Model                                          | 1                         | 711.02                | 711.02              | 3866.25        | <0.001         |
| Residual                                       | 22                        | 4.05                  | 0.18                |                |                |
| Pure error                                     | 18                        | 3.02                  | 0.17                |                |                |
| Lack of fit                                    | 4                         | 1.03                  | 0.26                | 1.53           | 0.32           |
| <b>DENV2 system</b>                            |                           |                       |                     |                |                |
| Model                                          | 1                         | 619.93                | 619.93              | 8543.06        | <0.001         |
| Residual                                       | 22                        | 1.6                   | 0.07                |                |                |
| Pure error                                     | 18                        | 0.85                  | 0.05                |                |                |
| Lack of fit                                    | 4                         | 0.75                  | 0.19                | 3.96           | 0.08           |
| <b>DENV3 system</b>                            |                           |                       |                     |                |                |
| Model                                          | 1                         | 856.84                | 856.84              | 2429.18        | <0.001         |
| Residual                                       | 22                        | 7.76                  | 0.35                |                |                |
| Pure error                                     | 18                        | 6.67                  | 0.37                |                |                |
| Lack of fit                                    | 4                         | 1.09                  | 0.27                | 0.74           | 0.61           |
| <b>DENV4 system</b>                            |                           |                       |                     |                |                |
| Model                                          | 1                         | 500.70                | 500.70              | 3065.06        | <0.001         |
| Residual                                       | 18                        | 2.94                  | 0.16                |                |                |
| Pure error                                     | 15                        | 1.85                  | 0.12                |                |                |
| Lack of fit                                    | 3                         | 1.09                  | 0.27                | 2.22           | 0.20           |
